# Supplementary material for: Root exudates as natural ligands that alter the properties of graphene oxide and environmental implications thereof
Source: Royal Society of Chemistry journal article supplement (doi:10.1039/c4ra16340k), 2015-01-01
Supplement: c4ra16340k1.pdf [file c4ra16340k1.pdf]

Supporting Information

**Root exudates as natural ligands that alter the property of  
graphene oxide and environmental implications thereof**

Junjie Du<sup>a</sup>, Li Mu<sup>b</sup>, Shaohu Ouyang<sup>a</sup>, Chaoxiu Ren<sup>a</sup>, Yingda Du<sup>a</sup>, Xiangang Hu<sup>\*a</sup> and  
Qixing Zhou<sup>\*a</sup>

<sup>a</sup>Key Laboratory of Pollution Processes and Environmental Criteria (Ministry of Education), Tianjin Key Laboratory of  
Environmental Remediation and Pollution Control, College of Environmental Science and Engineering, Nankai University,  
Tianjin 300071, China.

<sup>b</sup>Institute of Agro-environmental Protection, Ministry of Agriculture, Tianjin 300191, China.

Correspondence authors:

\* E-mail: [huxiangang@nankai.edu.cn](mailto:huxiangang@nankai.edu.cn) (X.H); [zhouqx@nankai.edu.cn](mailto:zhouqx@nankai.edu.cn) (Q.Z),

Phone: +86-022-23507800; fax: +86-022-66229562;

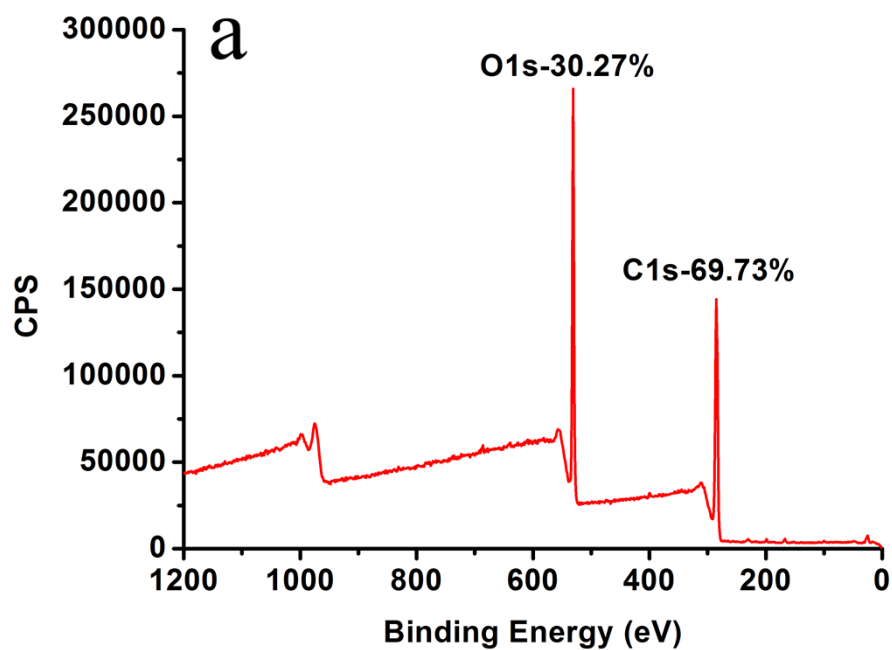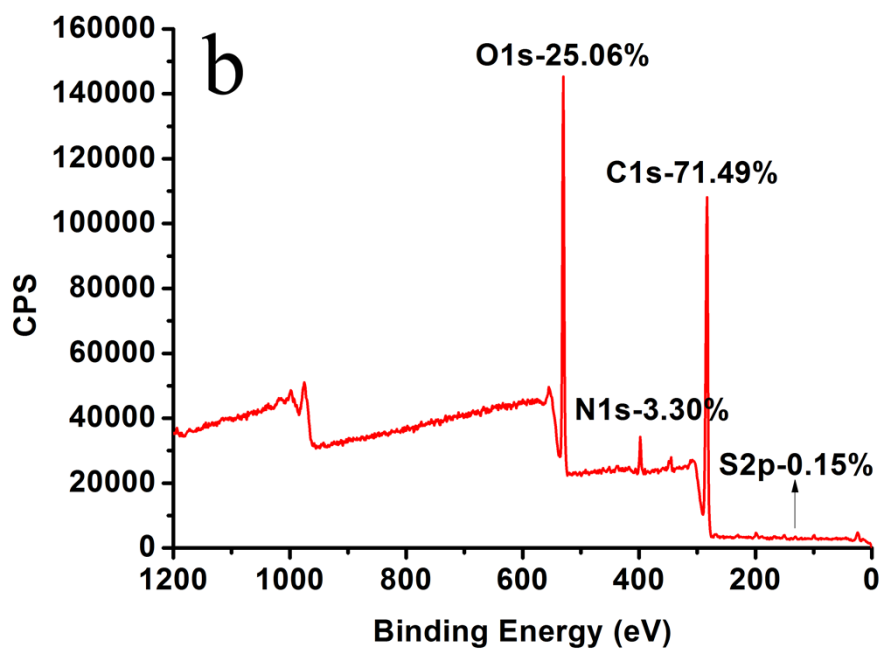

Figure S1. X-ray photoelectron spectra (XPS) of PGO and LGO: full spectrum of PGO (a) and full spectrum of LGO (b).

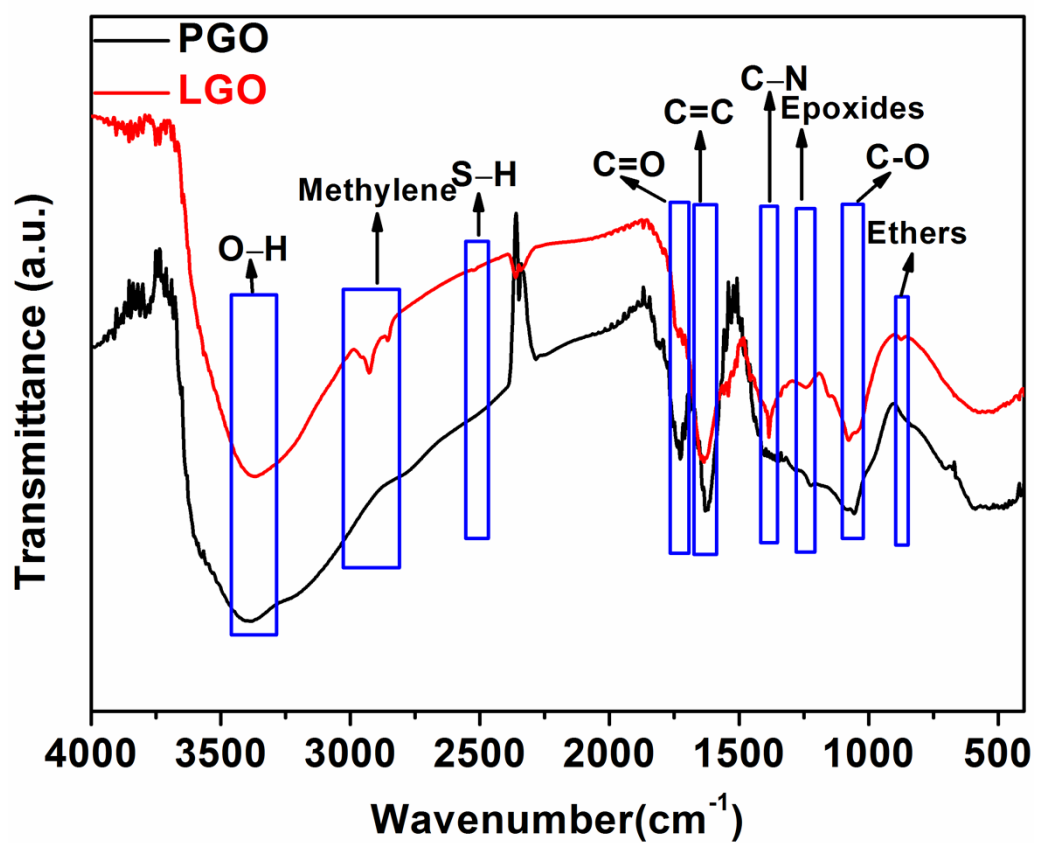

Figure S2. Fourier transform infrared spectroscopy (FTIR) spectra of PGO (pristine graphene oxide) and LGO (root exudates as ligand-graphene oxide complexes).

Table S1. Rice root exudates in the control without PGO exposure

| Number | Name                                                  | Relative abundance <sup>a</sup> |
|--------|-------------------------------------------------------|---------------------------------|
| 1      | Cyclohexanol                                          | 113002 ± 3251                   |
| 2      | Glycerol                                              | 207376 ± 10775                  |
| 3      | 1,2-Propanediol                                       | 6344 ± 169                      |
| 4      | 1-Butanol                                             | 12662 ± 605                     |
| 5      | Phenol                                                | 19692 ± 157                     |
| 6      | 2-Butene-1,4-diol                                     | 23810 ± 1238                    |
| 7      | Methylbutanoic acid                                   | 19795 ± 675                     |
| 8      | Acetic acid                                           | 41467 ± 2126                    |
| 9      | Gluconic acid                                         | 4139 ± 313                      |
| 10     | Hexadecanoic acid                                     | 291474 ± 10537                  |
| 11     | Octadecanoic acid                                     | 313936 ± 6923                   |
| 12     | Benzenepropanoic acid                                 | 26716 ± 1062                    |
| 13     | Dodecanoic acid                                       | 1049 ± 64                       |
| 14     | tetradecanoic acid                                    | 71505 ± 2454                    |
| 15     | L-(+)-Lactic acid                                     | 17753 ± 726                     |
| 16     | Acetate                                               | 2993 ± 89                       |
| 17     | Xylose                                                | 1239 ± 28                       |
| 18     | 1-Undecene                                            | 118451 ± 5444                   |
| 19     | Cyclohexen                                            | 4098 ± 86                       |
| 20     | Nonene                                                | 4160 ± 82                       |
| 21     | Propene                                               | 2345 ± 141                      |
| 22     | Hexanal                                               | 4680 ± 271                      |
| 23     | Benzaldehyde                                          | 18111 ± 343                     |
| 24     | Phenylpropane                                         | 6714 ± 286                      |
| 25     | Alkane (C2, C3, C5, C8, C10, C12, C13, C15, C16, C18) | 345187 ± 11450                  |

PGO, pristine graphene oxide.

<sup>a</sup> The errors are represented by standard errors ( $n = 3$ ).

Table S2. Rice root exudates in the aqueous phase of PGO exposure group

| Number | Name                           | Relative abundance <sup>a</sup> |
|--------|--------------------------------|---------------------------------|
| 1      | Cyclohexanol                   | 185344 ± 11034                  |
| 2      | Glycerol                       | 240874 ± 4642                   |
| 3      | 1,2-Propanediol                | 12974 ± 1057                    |
| 4      | 1-Butanol                      | 28568 ± 853                     |
| 5      | Phenol                         | 10726 ± 513                     |
| 6      | 2-Butene-1,4-diol              | 18087 ± 667                     |
| 7      | Isoborneol                     | 5623 ± 253                      |
| 8      | Isobutyl alcohol               | 3032 ± 167                      |
| 9      | Geraniol                       | 12834 ± 431                     |
| 10     | Geranylgeraniol                | 9809 ± 517                      |
| 11     | Oleyl alcohol                  | 4811 ± 537                      |
| 12     | Ethanol                        | 2287 ± 123                      |
| 13     | 2-Octanol                      | 9706 ± 162                      |
| 14     | Ethanethiol                    | 22256 ± 1206                    |
| 15     | Methylbutanoic acid            | 23367 ± 742                     |
| 16     | Acetic acid                    | 151031 ± 5379                   |
| 17     | Gluconic acid                  | 19947 ± 1193                    |
| 18     | Hexadecanoic acid              | 264882 ± 6745                   |
| 19     | Octadecanoic acid              | 289647 ± 5612                   |
| 20     | Benzenepropanoic acid          | 52321 ± 1124                    |
| 21     | Dodecanoic acid                | 5360 ± 321                      |
| 22     | Tetradecanoic acid             | 71505 ± 2375                    |
| 23     | Octadecenoic acid              | 4403 ± 130                      |
| 24     | Oxiranecarboxylic acid         | 3336 ± 76                       |
| 25     | 17-Octadecynoic acid           | 17463 ± 141                     |
| 26     | 3-Cyclopentenecarboxylic acid  | 3641 ± 73                       |
| 27     | Octanoic acid                  | 2332 ± 69                       |
| 28     | Pentanoic acid                 | 4845 ± 120                      |
| 29     | Propanoic acid                 | 3089 ± 79                       |
| 30     | Butanoic acid                  | 1023 ± 83                       |
| 31     | Butanedioic acid               | 15155 ± 654                     |
| 32     | Cyclopropane-1-carboxylic acid | 8357 ± 165                      |
| 33     | Benzenebutanoic acid           | 14696 ± 890                     |
| 34     | Ethanimidic acid               | 70222 ± 3587                    |
| 35     | Carbonodithioic O,S-acid       | 203914 ± 7342                   |
| 36     | Butyramide                     | 50639 ± 2349                    |
| 37     | Alanine                        | 6383 ± 532                      |
| 38     | Xylose                         | 3573 ± 268                      |
| 39     | 1-Undecene                     | 101669 ± 863                    |
| 40     | Cyclohexen                     | 4098 ± 432                      |
| 41     | Nonene                         | 2285 ± 159                      |
| 42     | Hexanal                        | 5586 ± 321                      |

---

|    |                                                        |              |
|----|--------------------------------------------------------|--------------|
| 43 | Nonanal                                                | 1427 ± 83    |
|    | Benzaldehyde                                           | 16816 ± 843  |
| 45 | Benzenesulfonic acid                                   | 8512 ± 456   |
| 46 | Phenylpropane                                          | 28007 ± 1403 |
| 47 | Alkane (C2, C3, C5, C8, C10, C12,<br>C13,C15, C16,C18) | 80141 ± 8756 |

---

PGO, pristine graphene oxide.

<sup>a</sup>The errors are represented by standard errors ( $n = 3$ ).

Table S3. Rice root exudates in the adsorption phase (LGO) of PGO exposure group

| Number | Name                         | Relative abundance <sup>a</sup> |
|--------|------------------------------|---------------------------------|
| 1      | Glycerol                     | 384050 ± 7296                   |
| 2      | Phenol                       | 109727 ± 5596                   |
| 3      | Ethanethiol                  | 22256 ± 178                     |
| 4      | Bisphenol                    | 49636 ± 1346                    |
| 5      | Thymol                       | 1600696 ± 85836                 |
| 6      | D-Mannitol                   | 473459 ± 19411                  |
| 7      | Geraniol                     | 16994 ± 611                     |
| 8      | Hexadecanoic acid            | 2415764 ± 125619                |
| 9      | Octadecanoic acid            | 211500 ± 6345                   |
| 10     | 2-Monostearin                | 151424 ± 4537                   |
| 11     | Azelaic acid                 | 110322 ± 3971                   |
| 12     | Benzenepropanoic acid        | 25315 ± 699                     |
| 13     | Phthalic acid                | 37753 ± 1515                    |
| 14     | Benzenebutanoic acid         | 51395 ± 2021                    |
| 15     | 1,4-Benzenedicarboxylic acid | 140847 ± 3239                   |
| 16     | Salicylic acid               | 365692 ± 13164                  |
| 17     | Ethanimidic acid             | 70222 ± 1631                    |
| 18     | 4-Pentenoic acid             | 20444 ± 1034                    |
| 19     | Myristic acid                | 55058 ± 1385                    |
| 20     | Carbonodithioic O,S-acid     | 203914 ± 10191                  |
| 21     | Ethanedioic acid             | 154734 ± 2321                   |
| 22     | Butanedioic acid             | 86591 ± 1771                    |
| 23     | Butylated hydroxytoluene     | 125458 ± 6398                   |
| 24     | Undecene                     | 22543 ± 202                     |
| 25     | Coronene                     | 2455149 ± 61471                 |
| 26     | Butyramide                   | 50639 ± 208                     |
| 27     | Propiophenone                | 25572 ± 251                     |
| 28     | Benzaldehyde                 | 25081 ± 332                     |
| 29     | 9-Acetylphenanthrene         | 78996 ± 157                     |
| 30     | Cyclohexene                  | 1823776 ± 9299                  |
| 31     | Pentacosane                  | 33140 ± 1230                    |

PGO, pristine graphene oxide; LGO, root exudates as ligands-graphene oxide.

<sup>a</sup>The errors are represented by standard errors ( $n = 3$ ).
